# Supplementary material for: Worry about Radiation and Its Risk Factors Five to Ten Years after the Fukushima Nuclear Power Plant Disaster
Source: MDPI journal article supplement (doi:10.3390/ijerph192416943), 2022-12-16
Supplement: s1 [file s1]

## Supplement

Supplemental Table S1. Comparisons of the level of worry about radiation between the respondents to the next survey and those who dropped out or whose score was missing in each survey.

|                             | Respondents <sup>1)</sup> | Worry about radiation at the preceding survey |     |  | P <sup>2)</sup> |
|-----------------------------|---------------------------|-----------------------------------------------|-----|--|-----------------|
|                             | N                         | Mean                                          | SD  |  |                 |
| Worry about radiation at T1 |                           |                                               |     |  |                 |
| T2 respondents              | 1,158                     | 14.9                                          | 4.4 |  | 0.945           |
| Drop out or missing         | 596                       | 14.9                                          | 4.5 |  |                 |
| Worry about radiation at T2 |                           |                                               |     |  |                 |
| T3 respondents              | 833                       | 14.2                                          | 4.2 |  | 0.069           |
| Drop out or missing         | 382                       | 13.7                                          | 4.2 |  |                 |
| Worry about radiation at T3 |                           |                                               |     |  |                 |
| T4 respondents              | 740                       | 14.2                                          | 4.5 |  | 0.822           |
| Drop out or missing         | 156                       | 14.1                                          | 4.3 |  |                 |
| Worry about radiation at T4 |                           |                                               |     |  |                 |
| T5 respondents              | 678                       | 13.6                                          | 4.5 |  | 0.503           |
| Drop out or missing         | 92                        | 14.0                                          | 4.4 |  |                 |

SD, standard deviation

1) Number of respondents to each survey for whom the score of worry about radiation in the preceding survey was not missing.

2) The scores of respondents and of those who dropped out or whose score was missing were compared using a t-test.

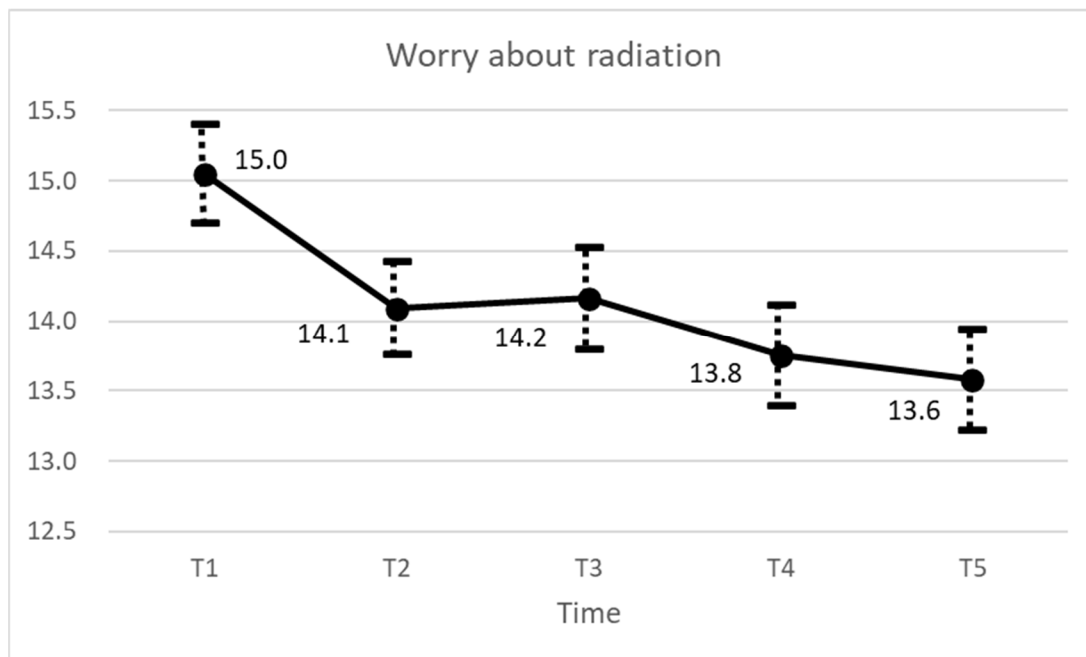

**Supplemental Figure S1.** Time course change in worry about radiation (means and 95% confidence intervals) five-to-ten years after the nuclear power plant accident among those who responded to all the surveys (N=607). T1: baseline survey or five years after the nuclear power plant accident; T2: second survey or 20 months after T1; T3: third survey or 32 months after T1; T4: fourth survey or 44 months after T1; T5: fifth survey or 56 months after T1. The differences between the scores at the five time points were statistically significant (repeated-measures ANOVA;  $F=25.67$ ,  $df=4, 2424$ ,  $p<0.001$ ).
